# Supplementary material for: Differentiated oxidation modes of guanine between CpG and 5mCpG by a photoactivatable Pt(iv) anticancer prodrug
Source: Royal Society of Chemistry journal article supplement (doi:10.1039/d2dt03924a), 2023-01-01
Supplement: d2dt03924a1.pdf [file d2dt03924a1.pdf]

## **Differentiated oxidation modes of guanine between CpG and <sup>5m</sup>CpG by a photoactivatable Pt(IV) anticancer prodrug**

Ziqi Ma,<sup>1†</sup> Jishuai Zhang,<sup>1†</sup> Jiafan Lin,<sup>1</sup> Wenbing Li,<sup>1</sup> Xiaoqin Wu,<sup>1</sup> Fuyi Wang,<sup>2,3</sup> Yao Zhao,<sup>2,\*</sup> Kui Wu<sup>1,\*</sup>

1. Key Laboratory of Hubei Province for Coal Conversion and New Carbon Materials; School of Chemistry and Chemical Engineering, Wuhan University of Science and Technology, Wuhan 430081, P. R. China

2. Beijing National Laboratory for Molecular Sciences; National Centre for Mass Spectrometry in Beijing; CAS Key Laboratory of Analytical Chemistry for Living Biosystems, Institute of Chemistry, Chinese Academy of Sciences, Beijing 100190, P. R. China

3. University of Chinese Academy of Sciences, Beijing 100049, P. R. China

### **Electronic Supplementary Information**

Purity of the synthesized complex **1**

Table S1. MS data of the reaction mixture between Pt(IV) complex **1** and 5'-CpG

Table S2. MS/MS data of platinated adducts between Pt(IV) complex **1** and 5'-CpG

Table S3. MS data of the reaction mixture between Pt(IV) complex **1** and 5'-<sup>5m</sup>CpG

Table S4. MS/MS data of platinated adducts between Pt(IV) complex **1** and 5'-<sup>5m</sup>CpG

### Purity of the synthesized complex 1

HPLC,  $^1\text{H}$  NMR and ESI-MS were applied to verify the structure of synthesized complex 1. For HPLC assay, an Agilent 1200 system using a C18 reversed-phase column ( $4.6 \times 150$  mm,  $5 \mu\text{m}$ , Agilent Technologies Co. Ltd.). The mobile phases were water containing 0.1% TFA (Solvent A) and acetonitrile containing 0.1% TFA (Solvent B). The gradient was: (B%) 5% from 0 to 3 min, increasing to 55% at 18 min, then maintaining 55% until 25 min, and finally resetting to 5% at 26 min. The eluent at a flow rate of 1 mL/min.

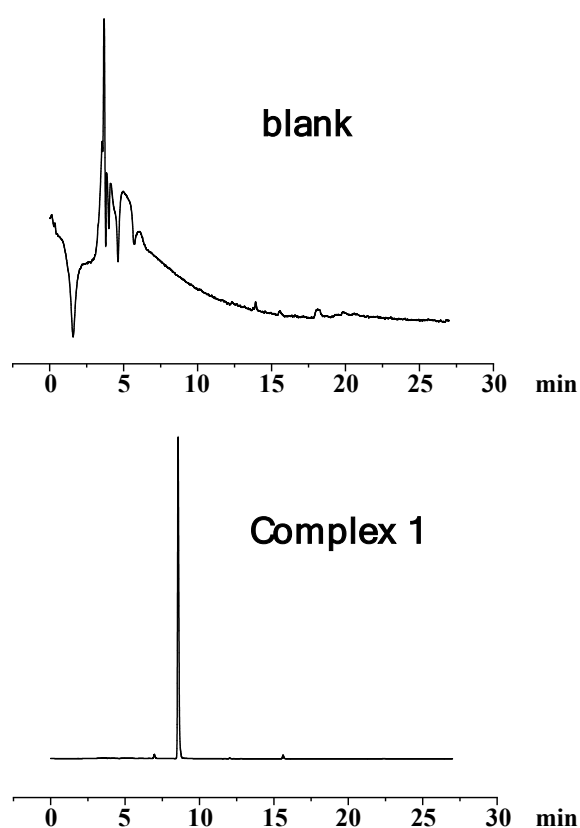

$^1\text{H}$  NMR ( $\text{D}_2\text{O}$ , Agilent DD2 600 MHz spectrometer):  $\delta = 8.76$  (d,  $J_{\text{H1H1H}} = 6$  Hz, 4H, py-Ha), 8.26 (t,  $J_{\text{H1H1H}} = 8$  Hz, 2H, py-Hc), 7.79 (t,  $J_{\text{H1H1H}} = 7$  Hz, 4H, py-Hb).

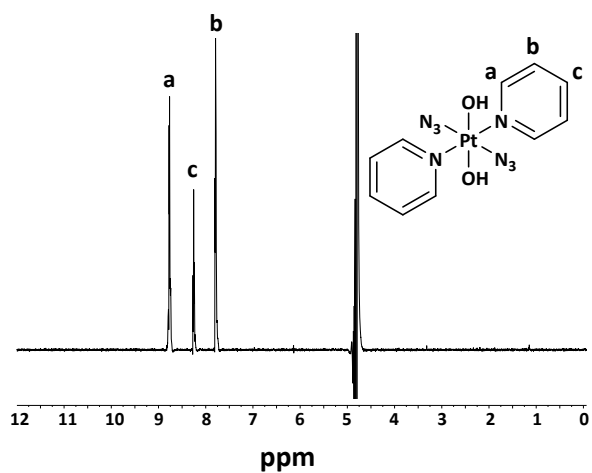

The obtained ESI-MS data was as follows: ESI-MS:  $m/z$  (the most abundant isotopomer) 494.068 ( $M + \text{Na}^+$ ,  $\text{C}_{10}\text{H}_{12}\text{N}_8\text{O}_2\text{PtNa}$  requires 494.067);  $m/z$  943.168 ( $M_2 + \text{H}^+$ ,  $\text{C}_{20}\text{H}_{24}\text{N}_{16}\text{O}_4\text{Pt}_2$  requires 943.162);  $m/z$  965.145 ( $M_2 + \text{Na}^+$ ,  $\text{C}_{20}\text{H}_{24}\text{N}_{16}\text{O}_4\text{Pt}_2\text{Na}$  requires 965.135).

**Table S1.** Mass data for the reaction mixture between Pt(IV) complex **1** and 5'-CpG at a molar ratio of Pt/CpG = 1.0 after irradiated under blue light for 1 h (Charges for Pt moiety in platinated nucleotides and the protons for balancing the charges of the ions are omitted for clarity). All the platinated products were numbered as their appearances in the main text and the corresponding numbers are shown in bold.

| Fragment ions                                                                                                                                                                                    | Molecular formula                                                                                                                                                      | Observed<br><i>m/z</i> | Theoretical<br><i>m/z</i> |
|--------------------------------------------------------------------------------------------------------------------------------------------------------------------------------------------------|------------------------------------------------------------------------------------------------------------------------------------------------------------------------|------------------------|---------------------------|
| {[CpG] <sub>2</sub> + [Pt(N <sub>3</sub> )(py) <sub>2</sub> ]} <sup>+</sup>                                                                                                                      | C <sub>48</sub> H <sub>59</sub> N <sub>21</sub> O <sub>20</sub> P <sub>2</sub> Pt                                                                                      | 1507.318               | 1507.344                  |
| {[CpG] + [Pt(N <sub>3</sub> )(py) <sub>2</sub> ]} <sup>+</sup> <b>3</b> <sup>+</sup>                                                                                                             | C <sub>39</sub> H <sub>43</sub> N <sub>18</sub> O <sub>10</sub> PPt <sub>2</sub>                                                                                       | 1345.233               | 1345.251                  |
| {[CpG] <sub>4</sub> + [Pt(N <sub>3</sub> )(py) <sub>2</sub> ]} <sup>2+</sup>                                                                                                                     | C <sub>86</sub> H <sub>109</sub> N <sub>37</sub> O <sub>40</sub> P <sub>4</sub> Pt                                                                                     | 1310.803               | 1310.820                  |
| {[CpG – C] + [Pt(N <sub>3</sub> )(py) <sub>2</sub> ]} <sup>+</sup> <b>6</b>                                                                                                                      | C <sub>35</sub> H <sub>38</sub> N <sub>15</sub> O <sub>9</sub> PPt <sub>2</sub>                                                                                        | 1234.191               | 1234.208                  |
| [CpG] <sub>2</sub> <sup>+</sup>                                                                                                                                                                  | C <sub>38</sub> H <sub>50</sub> N <sub>16</sub> O <sub>20</sub> P <sub>2</sub>                                                                                         | 1113.280               | 1113.292                  |
| {[(ImidCyt)p(RedSp)] + [Pt(N <sub>3</sub> )(py) <sub>2</sub> ]} <sup>+</sup> <b>15</b>                                                                                                           | C <sub>29</sub> H <sub>38</sub> N <sub>13</sub> O <sub>15</sub> PPt                                                                                                    | 1035.195               | 1035.207                  |
| {[(CytGly)p(RedSp)] + [Pt(N <sub>3</sub> )(py) <sub>2</sub> ]} <sup>+</sup> <b>14</b>                                                                                                            | C <sub>29</sub> H <sub>38</sub> N <sub>13</sub> O <sub>14</sub> PPt                                                                                                    | 1019.184               | 1019.212                  |
| {[(ImidCyt)p(oxG)] + [Pt(N <sub>3</sub> )(py) <sub>2</sub> ]} <sup>+</sup> <b>13</b>                                                                                                             | C <sub>29</sub> H <sub>36</sub> N <sub>13</sub> O <sub>14</sub> PPt                                                                                                    | 1017.184               | 1017.196                  |
| {[CpG] + [Pt(NH <sub>3</sub> )(py) <sub>2</sub> ] + MeCN + 2Na} <sup>+</sup>                                                                                                                     | C <sub>31</sub> H <sub>37</sub> N <sub>12</sub> O <sub>10</sub> PNa <sub>2</sub> Pt                                                                                    | 1010.194               | 1010.201                  |
| {[(UraGly)pG] + [Pt(N <sub>3</sub> )(py) <sub>2</sub> ] + Na} <sup>+</sup> <b>11a+Na</b><br>or {[(5-OH-U)p(FapyG)] + [Pt(N <sub>3</sub> )(py) <sub>2</sub> ] + Na} <sup>+</sup><br><b>11b+Na</b> | C <sub>29</sub> H <sub>34</sub> N <sub>12</sub> O <sub>13</sub> PNaPt                                                                                                  | 1008.183               | 1008.173                  |
| {[CpG] + [Pt(N <sub>3</sub> )(py) <sub>2</sub> ] + Na} <sup>+</sup> <b>2+Na</b>                                                                                                                  | C <sub>29</sub> H <sub>33</sub> N <sub>13</sub> O <sub>10</sub> PNaPt                                                                                                  | 973.173                | 973.183                   |
| {[CpG] + [Pt(N <sub>3</sub> )(py) <sub>2</sub> ]} <sup>+</sup> <b>2</b>                                                                                                                          | C <sub>29</sub> H <sub>34</sub> N <sub>13</sub> O <sub>10</sub> PPt                                                                                                    | 951.191                | 951.201                   |
| {[Cp(DGh)] + [Pt(py) <sub>2</sub> ]} <sup>+</sup> <b>10</b>                                                                                                                                      | C <sub>28</sub> H <sub>33</sub> N <sub>10</sub> O <sub>11</sub> PPt                                                                                                    | 912.189                | 912.179                   |
| {[Cp(Gh)] + [Pt(N)(py) <sub>2</sub> ] – H <sub>2</sub> O} <sup>+</sup> <b>9</b>                                                                                                                  | C <sub>28</sub> H <sub>34</sub> N <sub>11</sub> O <sub>10</sub> PPt                                                                                                    | 911.191                | 911.195                   |
| {[CpG – C] + [Pt(N <sub>3</sub> )(py) <sub>2</sub> ]} <sup>+</sup> <b>4</b>                                                                                                                      | C <sub>25</sub> H <sub>29</sub> N <sub>10</sub> O <sub>9</sub> PPt                                                                                                     | 840.150                | 840.158                   |
| {[Cp <sup>ox</sup> G – C] + [Pt(N <sub>3</sub> )(py)] + MeCN} <sup>+</sup> <b>8+MeCN</b>                                                                                                         | C <sub>22</sub> H <sub>27</sub> N <sub>10</sub> O <sub>10</sub> PPt                                                                                                    | 818.147                | 818.137                   |
| {[CpG – G] + [Pt(N <sub>3</sub> )(py) <sub>2</sub> ]} <sup>+</sup> <b>5</b>                                                                                                                      | C <sub>24</sub> H <sub>29</sub> N <sub>8</sub> O <sub>9</sub> PPt                                                                                                      | 800.144                | 800.152                   |
| {[CpG] <sub>2</sub> + [Pt(N <sub>3</sub> )(py) <sub>2</sub> ] + K} <sup>2+</sup>                                                                                                                 | C <sub>48</sub> H <sub>58</sub> N <sub>21</sub> O <sub>20</sub> P <sub>2</sub> KPt                                                                                     | 773.141                | 773.154                   |
| {w + [Pt(N <sub>3</sub> )(py) <sub>2</sub> ]} <sup>+</sup>                                                                                                                                       | C <sub>20</sub> H <sub>23</sub> N <sub>10</sub> O <sub>7</sub> PPt                                                                                                     | 742.119                | 742.121                   |
| {d + [Pt(N <sub>3</sub> )(py) <sub>2</sub> ]} <sup>+</sup>                                                                                                                                       | C <sub>19</sub> H <sub>23</sub> N <sub>8</sub> O <sub>7</sub> PPt                                                                                                      | 702.115                | 702.115                   |
| {[CpG] + [Pt(N <sub>3</sub> )(py) <sub>2</sub> ]} <sup>2+</sup> <b>3</b> <sup>2+</sup>                                                                                                           | C <sub>39</sub> H <sub>43</sub> N <sub>18</sub> O <sub>10</sub> PPt <sub>2</sub>                                                                                       | 673.125                | 673.129                   |
| {[Cp <sup>ox</sup> G] + [Pt(N)(py) <sub>2</sub> ]} <sup>2+</sup> <b>7a</b> or<br>{[Cp(DIz)] + [Pt(N <sub>3</sub> )(py) <sub>2</sub> ]} <sup>2+</sup> <b>7b</b>                                   | C <sub>39</sub> H <sub>43</sub> N <sub>14</sub> O <sub>11</sub> PPt <sub>2</sub> or<br>C <sub>37</sub> H <sub>43</sub> N <sub>18</sub> O <sub>9</sub> PPt <sub>2</sub> | 653.126                | 653.120<br>653.132        |
| {w + [Pt(N)(py)]} <sup>+</sup>                                                                                                                                                                   | C <sub>15</sub> H <sub>18</sub> N <sub>7</sub> O <sub>7</sub> PPt                                                                                                      | 635.079                | 635.073                   |
| {[CpG] + [Pt(py) <sub>2</sub> ] + [Pt(N <sub>3</sub> )(py)] + MeCN} <sup>2+</sup>                                                                                                                | C <sub>36</sub> H <sub>40</sub> N <sub>15</sub> O <sub>10</sub> PPt <sub>2</sub>                                                                                       | 632.609                | 632.613                   |
| {[CpG] + K} <sup>+</sup>                                                                                                                                                                         | C <sub>19</sub> H <sub>24</sub> N <sub>8</sub> O <sub>10</sub> PK                                                                                                      | 595.098                | 595.106                   |
| {[CpG] + Na} <sup>+</sup>                                                                                                                                                                        | C <sub>19</sub> H <sub>24</sub> N <sub>8</sub> O <sub>10</sub> PNa                                                                                                     | 579.133                | 579.132                   |
| [CpG] <sup>+</sup>                                                                                                                                                                               | C <sub>19</sub> H <sub>25</sub> N <sub>8</sub> O <sub>10</sub> P                                                                                                       | 557.151                | 557.150                   |

|                                                             |                                |         |         |
|-------------------------------------------------------------|--------------------------------|---------|---------|
| $\{G + [Pt(N_3)(py)_2]\}^+$                                 | $C_{15}H_{14}N_{10}OPt$        | 546.106 | 546.107 |
| $\{G + [Pt(py)_2] + MeCN\}^+$                               | $C_{17}H_{16}N_8OPt$           | 544.117 | 544.117 |
| $\{C + G + [Pt(py)]\}^+$                                    | $C_{14}H_{13}N_9O_2Pt$         | 535.092 | 535.091 |
| $\{C + [Pt(N_3)(py)_2]\}^+$                                 | $C_{14}H_{14}N_8OPt$           | 506.102 | 506.101 |
| $\{G + [Pt(py)_2]\}^+$                                      | $C_{15}H_{13}N_7OPt$           | 503.093 | 503.090 |
| $\{[CpG] + [Pt(N_3)(py)_2] + K\}^{2+}$                      | $C_{29}H_{33}N_{13}O_{10}PPtK$ | 495.078 | 495.082 |
| $[Pt(N_3)_2(H_2O)_2(py)_2]^+$                               | $C_{10}H_{14}N_8O_2Pt$         | 474.101 | 474.096 |
| $\{[(5-OH-C)p(DGh)] + [Pt^{III}(N)(py)_2]\}^{2+}$ <b>12</b> | $C_{28}H_{33}N_{11}O_{12}PPt$  | 471.583 | 471.592 |
| $\{G + [Pt(py)] + MeCN\}^+$                                 | $C_{12}H_{11}N_7OPt$           | 465.077 | 465.075 |
| $[CpG - C]^+$                                               | $C_{15}H_{20}N_5O_9P$          | 446.110 | 446.107 |
| $[CpG - G]^+$                                               | $C_{14}H_{20}N_3O_9P$          | 406.099 | 406.101 |
| $[Pt(N_3)(py)_2]^+$                                         | $C_{10}H_9N_5Pt$               | 395.061 | 395.058 |
| $[Pt^{III}(OH)_2(py)_2]^+$                                  | $C_{10}H_{11}N_2O_2Pt$         | 387.057 | 387.054 |
| $[Pt^{III}(N)(OH)(py)_2]^+$                                 | $C_{10}H_{10}N_3OPt$           | 384.053 | 384.054 |
| $[Pt(N)(py)_2]^+$                                           | $C_{10}H_9N_3Pt$               | 367.049 | 367.052 |
| $[w]^+$                                                     | $C_{10}H_{14}N_5O_7P$          | 348.074 | 348.070 |
| $\{G + [Pt(py)_2] + MeCN\}^{2+}$                            | $C_{17}H_{16}N_8OPt$           | 272.568 | 272.562 |
| $[G]^+$                                                     | $C_5H_5N_5O$                   | 152.061 | 152.057 |
| $[C]^+$                                                     | $C_4H_5N_3O$                   | 112.055 | 112.053 |

---

**Table S2.** Fragment ions observed by MS/MS analysis under positive ion mode of the mono- and di-platinated adducts  $\{[\text{CpG}] + [\text{Pt}(\text{N}_3)(\text{py})_2]_2\}^+$ ,  $\{[\text{CpG}] + [\text{Pt}(\text{N}_3)(\text{py})_2] + \text{Na}\}^+$ ,  $\{[\text{CpG}] + [\text{Pt}(\text{N}_3)(\text{py})_2]\}^+$ , and  $\{[\text{CpG}] + [\text{Pt}(\text{N}_3)(\text{py})_2]\}^{2+}$  produced by the reaction of complex **1** with CpG at 373 K after irradiation under blue light for 1 h. (Charges for Pt moiety in platinated nucleotide and the protons for balancing the charges of the ions are omitted for clarity). The scheme shows the fragmentation pathways of 5'-CpG as a representative during the CID fragmentation.

| Fragment ions                                                                                                                                                     | Molecular formula                                                  | Observed<br>m/z | Theoretical<br>m/z |
|-------------------------------------------------------------------------------------------------------------------------------------------------------------------|--------------------------------------------------------------------|-----------------|--------------------|
| <b>Parent ion <math>\{[\text{CpG}] + [\text{Pt}(\text{N}_3)(\text{py})_2]_2\}^+</math> (<math>3^+</math>)</b>                                                     |                                                                    |                 |                    |
| $\{[\text{CpG}] + [\text{Pt}(\text{N}_3)(\text{py})_2]_2\}^+$                                                                                                     | $\text{C}_{39}\text{H}_{43}\text{N}_{18}\text{O}_{10}\text{PPt}_2$ | 1345.241        | 1345.251           |
| $\{[\text{CpG}] + [\text{Pt}(\text{N}_3)(\text{py})] + [\text{Pt}(\text{N}_3)(\text{py})_2]\}^+$                                                                  | $\text{C}_{34}\text{H}_{38}\text{N}_{17}\text{O}_{10}\text{PPt}_2$ | 1266.201        | 1266.209           |
| $\{[\text{CpG} - \text{C}] + [\text{Pt}(\text{N}_3)(\text{py})_2]_2\}^+$                                                                                          | $\text{C}_{35}\text{H}_{38}\text{N}_{15}\text{O}_9\text{PPt}_2$    | 1234.206        | 1234.208           |
| $\{[\text{CpG} - \text{C}] + \text{G} + [\text{Pt}(\text{py})] + [\text{Pt}(\text{N}_3)(\text{py})] + \text{MeCN}\}^+$                                            | $\text{C}_{32}\text{H}_{35}\text{N}_{16}\text{O}_{10}\text{PPt}_2$ | 1225.186        | 1225.182           |
| $\{[\text{CpG}] + [\text{Pt}(\text{N}_3)(\text{py})]_2\}^+$                                                                                                       | $\text{C}_{29}\text{H}_{33}\text{N}_{16}\text{O}_{10}\text{PPt}_2$ | 1187.159        | 1187.166           |
| $\{[\text{CpG}] + [\text{Pt}(\text{N})(\text{py})] + [\text{Pt}(\text{N}_3)(\text{py})]\}^+$                                                                      | $\text{C}_{29}\text{H}_{33}\text{N}_{14}\text{O}_{10}\text{PPt}_2$ | 1159.141        | 1159.160           |
| $\{\text{w} + [\text{Pt}(\text{N}_3)(\text{py})_2]_2\}^+$                                                                                                         | $\text{C}_{30}\text{H}_{32}\text{N}_{15}\text{O}_7\text{PPt}_2$    | 1136.161        | 1136.171           |
| $\{\text{w} + [\text{Pt}(\text{N}_3)(\text{py})] + [\text{Pt}(\text{N}_3)(\text{py})_2]\}^+$                                                                      | $\text{C}_{25}\text{H}_{27}\text{N}_{14}\text{O}_7\text{PPt}_2$    | 1057.136        | 1057.129           |
| $\{[\text{CpG}] + [\text{Pt}(\text{N})] + [\text{Pt}(\text{py})]\}^+$                                                                                             | $\text{C}_{24}\text{H}_{27}\text{N}_{10}\text{O}_{10}\text{PPt}_2$ | 1037.094        | 1037.101           |
| $\{[\text{CpG}] + [\text{Pt}(\text{N}_3)(\text{py})_2] + \text{Na}\}^+$                                                                                           | $\text{C}_{29}\text{H}_{33}\text{N}_{13}\text{O}_{10}\text{PNaPt}$ | 973.180         | 973.183            |
| $\{[\text{CpG}] + [\text{Pt}(\text{N}_3)(\text{py})_2]\}^+$                                                                                                       | $\text{C}_{29}\text{H}_{34}\text{N}_{13}\text{O}_{10}\text{PPt}$   | 951.198         | 951.201            |
| $\{\text{G} + [\text{Pt}(\text{N}_3)(\text{py})_2]_2\}^+$                                                                                                         | $\text{C}_{25}\text{H}_{23}\text{N}_{15}\text{OPt}_2$              | 940.151         | 940.157            |
| $\{\text{w} + [\text{Pt}(\text{N})(\text{py})] + [\text{Pt}(\text{N}_3)]\}^+$ or<br>$\{\text{w} + [\text{Pt}(\text{N}_3)(\text{py})] + [\text{Pt}(\text{N})]\}^+$ | $\text{C}_{15}\text{H}_{17}\text{N}_{10}\text{O}_7\text{PPt}_2$    | 871.033         | 871.038            |
| $\{[\text{CpG} - \text{C}] + [\text{Pt}(\text{N}_3)(\text{py})_2]\}^+$                                                                                            | $\text{C}_{25}\text{H}_{29}\text{N}_{10}\text{O}_9\text{PPt}$      | 840.157         | 840.158            |
| $\{\text{w} + [\text{Pt}(\text{N}_3)(\text{py})_2]\}^+$                                                                                                           | $\text{C}_{20}\text{H}_{23}\text{N}_{10}\text{O}_7\text{PPt}$      | 742.119         | 742.121            |
| $\{[\text{CpG}] + \text{Na}\}^+$                                                                                                                                  | $\text{C}_{19}\text{H}_{24}\text{N}_8\text{O}_{10}\text{PNa}$      | 579.133         | 579.132            |
| $[\text{CpG}]^+$                                                                                                                                                  | $\text{C}_{19}\text{H}_{25}\text{N}_8\text{O}_{10}\text{P}$        | 557.151         | 557.150            |
| $\{\text{G} + [\text{Pt}(\text{N}_3)(\text{py})_2]\}^+$                                                                                                           | $\text{C}_{15}\text{H}_{14}\text{N}_{10}\text{OPt}$                | 546.111         | 546.107            |
| $\{\text{C} + [\text{Pt}(\text{N}_3)(\text{py})_2]\}^+$                                                                                                           | $\text{C}_{14}\text{H}_{14}\text{N}_8\text{OPt}$                   | 506.103         | 506.101            |
| $[\text{w}]^+$                                                                                                                                                    | $\text{C}_{10}\text{H}_{14}\text{N}_5\text{O}_7\text{P}$           | 348.072         | 348.070            |
| <b>Parent ion <math>\{[\text{CpG}] + [\text{Pt}(\text{N}_3)(\text{py})_2] + \text{Na}\}^+</math> (<math>2 + \text{Na}</math>)</b>                                 |                                                                    |                 |                    |
| $\{[\text{CpG}] + [\text{Pt}(\text{N}_3)(\text{py})_2] + \text{Na}\}^+$                                                                                           | $\text{C}_{29}\text{H}_{33}\text{N}_{13}\text{O}_{10}\text{PNaPt}$ | 973.169         | 973.183            |
| $\{[\text{CpG}] + [\text{Pt}(\text{N}_3)(\text{py})] + \text{Na}\}^+$                                                                                             | $\text{C}_{24}\text{H}_{28}\text{N}_{12}\text{O}_{10}\text{PNaPt}$ | 894.132         | 894.141            |
| $\{[\text{CpG}] + [\text{Pt}(\text{N})(\text{py})] + \text{Na}\}^+$                                                                                               | $\text{C}_{24}\text{H}_{28}\text{N}_{10}\text{O}_{10}\text{PNaPt}$ | 866.134         | 866.135            |
| unspecified                                                                                                                                                       |                                                                    | 853.133         |                    |

|                                                                            |                                                                |         |         |
|----------------------------------------------------------------------------|----------------------------------------------------------------|---------|---------|
| $\{[\text{CpG}] + [\text{Pt}(\text{N})]\}^+$                               | $\text{C}_{19}\text{H}_{24}\text{N}_9\text{O}_{10}\text{PPt}$  | 765.107 | 765.111 |
| $\{\text{w} + [\text{Pt}(\text{N}_3)(\text{py})_2]\}^+$                    | $\text{C}_{20}\text{H}_{23}\text{N}_{10}\text{O}_7\text{PPt}$  | 742.111 | 742.121 |
| $\{\text{w} + [\text{Pt}(\text{N}_3)(\text{py})] + \text{Na}\}^+$          | $\text{C}_{15}\text{H}_{17}\text{N}_9\text{O}_7\text{PNaPt}$   | 685.058 | 685.061 |
| $\{[\text{CpG}] + \text{Na}\}^+$                                           | $\text{C}_{19}\text{H}_{24}\text{N}_8\text{O}_{10}\text{PNa}$  | 579.128 | 579.132 |
| $\{\text{G} + \text{C} + [\text{Pt}(\text{N})(\text{py})] + \text{Na}\}^+$ | $\text{C}_{14}\text{H}_{13}\text{N}_{10}\text{O}_2\text{NaPt}$ | 572.081 | 572.084 |
| $\{\text{G} + [\text{Pt}(\text{N}_3)(\text{py})_2] + \text{Na}\}^+$        | $\text{C}_{15}\text{H}_{13}\text{N}_{10}\text{ONaPt}$          | 568.086 | 568.089 |
| $[\text{CpG}]^+$                                                           | $\text{C}_{19}\text{H}_{25}\text{N}_8\text{O}_{10}\text{P}$    | 557.151 | 557.150 |
| $\{\text{G} + [\text{Pt}(\text{N}_3)(\text{py})_2]\}^+$                    | $\text{C}_{15}\text{H}_{14}\text{N}_{10}\text{OPt}$            | 546.106 | 546.107 |
| $\{\text{C} + [\text{Pt}(\text{N}_3)(\text{py})_2]\}^+$                    | $\text{C}_{14}\text{H}_{14}\text{N}_8\text{OPt}$               | 506.098 | 506.101 |
| $\{\text{G} + \text{Na}\}^+$                                               | $\text{C}_5\text{H}_4\text{N}_5\text{ONa}$                     | 174.043 | 174.039 |
| $[\text{G}]^+$                                                             | $\text{C}_5\text{H}_5\text{N}_5\text{O}$                       | 152.061 | 152.057 |
| $\{\text{C} + \text{Na}\}^+$                                               | $\text{C}_4\text{H}_4\text{N}_3\text{ONa}$                     | 134.035 | 134.032 |
| $[\text{C}]^+$                                                             | $\text{C}_4\text{H}_5\text{N}_3\text{O}$                       | 112.055 | 112.053 |

**Parent ion  $\{[\text{CpG}] + [\text{Pt}(\text{N}_3)(\text{py})_2]\}^+$  (2)**

|                                                                        |                                                                  |         |         |
|------------------------------------------------------------------------|------------------------------------------------------------------|---------|---------|
| $\{[\text{CpG}] + [\text{Pt}(\text{N}_3)(\text{py})_2]\}^+$            | $\text{C}_{29}\text{H}_{34}\text{N}_{13}\text{O}_{10}\text{PPt}$ | 951.199 | 951.201 |
| $\{[\text{CpG}] + [\text{Pt}(\text{N}_3)(\text{py})]\}^+$              | $\text{C}_{24}\text{H}_{29}\text{N}_{12}\text{O}_{10}\text{PPt}$ | 872.158 | 872.159 |
| $\{[\text{CpG} - \text{C}] + [\text{Pt}(\text{N}_3)(\text{py})_2]\}^+$ | $\text{C}_{25}\text{H}_{29}\text{N}_{10}\text{O}_9\text{PPt}$    | 840.157 | 840.158 |
| $\{[\text{CpG} - \text{G}] + [\text{Pt}(\text{N}_3)(\text{py})_2]\}^+$ | $\text{C}_{24}\text{H}_{29}\text{N}_8\text{O}_9\text{PPt}$       | 800.157 | 800.152 |
| $\{\text{w} + [\text{Pt}(\text{N}_3)(\text{py})_2]\}^+$                | $\text{C}_{20}\text{H}_{23}\text{N}_{10}\text{O}_7\text{PPt}$    | 742.125 | 742.121 |
| $\{\text{d} + [\text{Pt}(\text{N}_3)(\text{py})_2]\}^+$                | $\text{C}_{19}\text{H}_{23}\text{N}_8\text{O}_7\text{PPt}$       | 702.126 | 702.115 |
| $\{\text{w} + [\text{Pt}(\text{N})(\text{py})]\}^+$                    | $\text{C}_{15}\text{H}_{18}\text{N}_7\text{O}_7\text{PPt}$       | 635.074 | 635.073 |
| $\{\text{x} + [\text{Pt}(\text{N})(\text{py})]\}^+$                    | $\text{C}_{15}\text{H}_{16}\text{N}_7\text{O}_6\text{PPt}$       | 617.066 | 617.062 |
| $\{\text{G} + [\text{Pt}(\text{N}_3)(\text{py})_2]\}^+$                | $\text{C}_{15}\text{H}_{14}\text{N}_{10}\text{OPt}$              | 546.111 | 546.107 |
| $\{\text{C} + [\text{Pt}(\text{N}_3)(\text{py})_2]\}^+$                | $\text{C}_{14}\text{H}_{14}\text{N}_8\text{OPt}$                 | 506.106 | 506.101 |
| $\{\text{G} + [\text{Pt}(\text{N}_3)(\text{py})]\}^+$                  | $\text{C}_{10}\text{H}_9\text{N}_9\text{OPt}$                    | 467.066 | 467.065 |
| $[\text{CpG} - \text{C}]^+$                                            | $\text{C}_{15}\text{H}_{20}\text{N}_5\text{O}_9\text{P}$         | 446.112 | 446.107 |
| $\{\text{G} + [\text{Pt}(\text{N})(\text{py})]\}^+$                    | $\text{C}_{10}\text{H}_9\text{N}_7\text{OPt}$                    | 439.063 | 439.059 |
| $\{\text{C} + [\text{Pt}(\text{N}_3)(\text{py})]\}^+$                  | $\text{C}_9\text{H}_9\text{N}_7\text{OPt}$                       | 427.061 | 427.059 |
| $\{\text{C} + [\text{Pt}(\text{N})(\text{py})]\}^+$                    | $\text{C}_9\text{H}_9\text{N}_5\text{OPt}$                       | 399.059 | 399.053 |
| $[\text{w}]^+$                                                         | $\text{C}_{10}\text{H}_{14}\text{N}_5\text{O}_7\text{P}$         | 348.078 | 348.070 |
| $[\text{G}]^+$                                                         | $\text{C}_5\text{H}_5\text{N}_5\text{O}$                         | 152.062 | 152.057 |

**Parent ion  $\{[\text{CpG}] + [\text{Pt}(\text{N}_3)(\text{py})_2]_2\}^{2+}$  (3<sup>2+</sup>)**

|                                                                        |                                                                           |         |         |
|------------------------------------------------------------------------|---------------------------------------------------------------------------|---------|---------|
| $\{[\text{CpG}] + [\text{Pt}(\text{N}_3)(\text{py})_2]\}^+$            | $\text{C}_{29}\text{H}_{34}\text{N}_{13}\text{O}_{10}\text{PPt}$          | 951.201 | 951.201 |
| $\{[\text{CpG}] + [\text{Pt}(\text{N}_3)(\text{py})]\}^+$              | $\text{C}_{24}\text{H}_{29}\text{N}_{12}\text{O}_{10}\text{PPt}$          | 872.162 | 872.159 |
| $\{[\text{CpG} - \text{C}] + [\text{Pt}(\text{N}_3)(\text{py})_2]\}^+$ | $\text{C}_{25}\text{H}_{29}\text{N}_{10}\text{O}_9\text{PPt}$             | 840.156 | 840.158 |
| $\{[\text{CpG} - \text{G}] + [\text{Pt}(\text{N}_3)(\text{py})_2]\}^+$ | $\text{C}_{24}\text{H}_{29}\text{N}_8\text{O}_9\text{PPt}$                | 800.150 | 800.152 |
| $\{\text{w} + [\text{Pt}(\text{N}_3)(\text{py})_2]\}^+$                | $\text{C}_{20}\text{H}_{23}\text{N}_{10}\text{O}_7\text{PPt}$             | 742.119 | 742.121 |
| $\{[\text{CpG}] + [\text{Pt}(\text{N}_3)(\text{py})_2]_2\}^{2+}$       | $\text{C}_{39}\text{H}_{43}\text{N}_{18}\text{O}_{10}\text{PPt}_2$        | 673.130 | 673.129 |
| $[\text{CpG}]^+$                                                       | $\text{C}_{19}\text{H}_{25}\text{N}_8\text{O}_{10}\text{P}$               | 557.151 | 557.150 |
| $\{\text{G} + [\text{Pt}(\text{N}_3)(\text{py})_2]\}^+$                | $\text{C}_{15}\text{H}_{14}\text{N}_{10}\text{OPt}$                       | 546.109 | 546.107 |
| $\{[\text{w}]_2 + [\text{Pt}(\text{py})_2]\}^+$                        | $\text{C}_{30}\text{H}_{36}\text{N}_{12}\text{O}_{14}\text{P}_2\text{Pt}$ | 523.589 | 523.587 |
| $\{\text{C} + [\text{Pt}(\text{N}_3)(\text{py})_2]\}^+$                | $\text{C}_{14}\text{H}_{14}\text{N}_8\text{OPt}$                          | 506.101 | 506.101 |
| $\{\text{G} + [\text{Pt}(\text{N})(\text{py})]\}^+$                    | $\text{C}_{10}\text{H}_9\text{N}_7\text{OPt}$                             | 439.060 | 439.059 |
| $\{\text{C} + [\text{Pt}(\text{N})(\text{py})]\}^+$                    | $\text{C}_9\text{H}_9\text{N}_5\text{OPt}$                                | 399.053 | 399.053 |

|                                        |                                              |         |         |
|----------------------------------------|----------------------------------------------|---------|---------|
| $[\text{Pt}(\text{N}_3)(\text{py})]^+$ | $\text{C}_{10}\text{H}_9\text{N}_3\text{Pt}$ | 395.057 | 395.058 |
| $[\text{Pt}(\text{N})(\text{py})_2]^+$ | $\text{C}_{10}\text{H}_9\text{N}_3\text{Pt}$ | 367.056 | 367.052 |

---



**Table S3.** Ions identified by MS in the reaction mixture between Pt(IV) complex **1** and 5'-<sup>5m</sup>CpG at a molar ratio of Pt/<sup>5m</sup>CpG = 1.0 after irradiated under blue light for 1 h (Charges for Pt moiety in platinated nucleotides and the protons for balancing the charges of the ions are omitted for clarity). All the platinated products were numbered as their appearances in the main text and the corresponding numbers are shown in the following brackets.

| Fragment ions                                                                                                                  | Molecular formula                                                                              | Observed<br><i>m/z</i> | Theoretical<br><i>m/z</i> |
|--------------------------------------------------------------------------------------------------------------------------------|------------------------------------------------------------------------------------------------|------------------------|---------------------------|
| { <sup>5m</sup> CpG] <sub>2</sub> + [Pt(N <sub>3</sub> )(py) <sub>2</sub> ]} <sup>+</sup> <b>27</b>                            | C <sub>50</sub> H <sub>63</sub> N <sub>21</sub> O <sub>20</sub> P <sub>2</sub> Pt              | 1535.360               | 1535.376                  |
| { <sup>5m</sup> CpG] + [Pt(N <sub>3</sub> )(py) <sub>2</sub> ] <sub>2</sub> + 2O + 2(OH)} <sup>+</sup> <b>39</b>               | C <sub>40</sub> H <sub>47</sub> N <sub>18</sub> O <sub>14</sub> PPt <sub>2</sub>               | 1425.254               | 1425.262                  |
| { <sup>5m</sup> CpG] + [Pt(N <sub>3</sub> )(py) <sub>2</sub> ] <sub>2</sub> } <sup>+</sup> <b>18<sup>+</sup></b>               | C <sub>40</sub> H <sub>45</sub> N <sub>18</sub> O <sub>10</sub> PPt <sub>2</sub>               | 1359.254               | 1359.267                  |
| { <sup>5m</sup> CpG] <sub>4</sub> + [Pt(N <sub>3</sub> )(py) <sub>2</sub> ]} <sup>2+</sup> <b>29</b>                           | C <sub>90</sub> H <sub>117</sub> N <sub>37</sub> O <sub>40</sub> P <sub>4</sub> Pt             | 1338.837               | 1338.851                  |
| { <sup>5m</sup> CpG] <sub>3</sub> + [Pt(N <sub>3</sub> )(py) <sub>2</sub> ]} <sup>2+</sup> <b>30</b>                           | C <sub>80</sub> H <sub>99</sub> N <sub>34</sub> O <sub>30</sub> P <sub>3</sub> Pt <sub>2</sub> | 1250.780               | 1250.797                  |
| { <sup>5m</sup> CpG - <sup>5m</sup> C] + [Pt(N <sub>3</sub> )(py) <sub>2</sub> ]} <sup>+</sup> <b>31</b>                       | C <sub>35</sub> H <sub>38</sub> N <sub>15</sub> O <sub>9</sub> PPt <sub>2</sub>                | 1234.205               | 1234.208                  |
| { <sup>5m</sup> CpG] <sub>2</sub> + K} <sup>+</sup>                                                                            | C <sub>40</sub> H <sub>53</sub> N <sub>16</sub> O <sub>20</sub> P <sub>2</sub> K               | 1179.261               | 1179.281                  |
| [ <sup>5m</sup> CpG] <sub>2</sub> <sup>+</sup>                                                                                 | C <sub>40</sub> H <sub>54</sub> N <sub>16</sub> O <sub>20</sub> P <sub>2</sub>                 | 1141.317               | 1141.325                  |
| { <sup>5m</sup> CpG] <sub>3</sub> + [Pt(N <sub>3</sub> )(py) <sub>2</sub> ]} <sup>2+</sup> <b>28</b>                           | C <sub>70</sub> H <sub>90</sub> N <sub>29</sub> O <sub>30</sub> P <sub>3</sub> Pt              | 1053.764               | 1053.772                  |
| { <sup>5m</sup> CpG] + [Pt(N <sub>3</sub> )(py) <sub>2</sub> ] + H <sub>2</sub> O <sub>3</sub> + 2(OH)} <sup>+</sup> <b>38</b> | C <sub>30</sub> H <sub>40</sub> N <sub>13</sub> O <sub>15</sub> PPt                            | 1049.214               | 1049.223                  |
| { <sup>5m</sup> CpG] + [Pt(N <sub>3</sub> )(py) <sub>2</sub> ] + 2O + 2(OH)} <sup>+</sup> <b>37</b>                            | C <sub>30</sub> H <sub>38</sub> N <sub>13</sub> O <sub>14</sub> PPt                            | 1031.207               | 1031.212                  |
| { <sup>5m</sup> CpG] + [Pt(NH <sub>3</sub> )(py) <sub>2</sub> ] + 2Na + MeCN} <sup>+</sup>                                     | C <sub>32</sub> H <sub>39</sub> N <sub>12</sub> O <sub>10</sub> PNa <sub>2</sub> Pt            | 1024.215               | 1024.217                  |
| <b>33+MeCN+2Na</b>                                                                                                             |                                                                                                |                        |                           |
| { <sup>5m</sup> CpG] + [Pt(N)(py) <sub>2</sub> ] + 2Na + MeCN} <sup>+</sup>                                                    | C <sub>32</sub> H <sub>37</sub> N <sub>12</sub> O <sub>10</sub> PNa <sub>2</sub> Pt            | 1022.210               | 1022.201                  |
| <b>32+MeCN+2Na</b>                                                                                                             |                                                                                                |                        |                           |
| { <sup>5m</sup> CpG] + [Pt(N <sub>3</sub> )(py) <sub>2</sub> ] + H <sub>2</sub> O + 2(OH)} <sup>+</sup> <b>36</b>              | C <sub>30</sub> H <sub>40</sub> N <sub>13</sub> O <sub>13</sub> PPt                            | 1017.226               | 1017.233                  |
| { <sup>5m</sup> Cp(RedSp)] + [Pt(N <sub>3</sub> )(py) <sub>2</sub> ]} <sup>+</sup> <b>35</b>                                   | C <sub>30</sub> H <sub>38</sub> N <sub>13</sub> O <sub>12</sub> PPt                            | 999.212                | 999.222                   |
| { <sup>5m</sup> CpG] + [Pt(N <sub>3</sub> )(py) <sub>2</sub> ] + 2O} <sup>+</sup> <b>34a or 34b or 34c or 34d</b>              | C <sub>30</sub> H <sub>36</sub> N <sub>13</sub> O <sub>12</sub> PPt                            | 997.200                | 997.207                   |
| { <sup>5m</sup> CpG] + [Pt(N <sub>3</sub> )(py) <sub>2</sub> ]} <sup>+</sup> <b>16</b>                                         | C <sub>30</sub> H <sub>36</sub> N <sub>13</sub> O <sub>10</sub> PPt                            | 965.213                | 965.217                   |
| { <sup>5m</sup> CpG] + [Pt(py) <sub>2</sub> ] + MeCN} <sup>+</sup> <b>22+MeCN</b>                                              | C <sub>32</sub> H <sub>38</sub> N <sub>11</sub> O <sub>10</sub> PPt                            | 963.222                | 963.226                   |
| [Pt(N <sub>3</sub> ) <sub>2</sub> (OH) <sub>2</sub> (py) <sub>2</sub> ] <sub>2</sub> <sup>+</sup>                              | C <sub>20</sub> H <sub>24</sub> N <sub>16</sub> O <sub>4</sub> Pt <sub>2</sub>                 | 943.159                | 943.153                   |
| { <sup>5m</sup> Cp(Iz)] + [Pt(N <sub>3</sub> )(py) <sub>2</sub> ]} <sup>+</sup> <b>25</b>                                      | C <sub>28</sub> H <sub>35</sub> N <sub>12</sub> O <sub>10</sub> PPt                            | 926.209                | 926.206                   |
| { <sup>5m</sup> Cp(Iz)] + [Pt(py) <sub>2</sub> ] + MeCN} <sup>+</sup> <b>24+MeCN</b>                                           | C <sub>30</sub> H <sub>37</sub> N <sub>10</sub> O <sub>10</sub> PPt                            | 924.209                | 926.215                   |
| {RedSp + [Pt(N)(py) <sub>2</sub> ]} <sup>+</sup> <b>26</b>                                                                     | C <sub>25</sub> H <sub>25</sub> N <sub>11</sub> O <sub>3</sub> Pt <sub>2</sub>                 | 918.142                | 918.150                   |
| { <sup>5m</sup> CpG - <sup>5m</sup> C] + [Pt(N <sub>3</sub> )(py) <sub>2</sub> ]} <sup>+</sup> <b>17</b>                       | C <sub>25</sub> H <sub>29</sub> N <sub>10</sub> O <sub>9</sub> PPt                             | 840.156                | 840.158                   |
| { <sup>5m</sup> CpG - G] + [Pt(N <sub>3</sub> )(py) <sub>2</sub> ]} <sup>+</sup> <b>21</b>                                     | C <sub>25</sub> H <sub>31</sub> N <sub>8</sub> O <sub>9</sub> PPt                              | 814.162                | 814.167                   |
| { <sup>5m</sup> CpG] <sub>2</sub> + [Pt(N <sub>3</sub> )(py) <sub>2</sub> ] + K} <sup>2+</sup> <b>20+K</b>                     | C <sub>50</sub> H <sub>62</sub> N <sub>21</sub> O <sub>20</sub> P <sub>2</sub> KPt             | 787.163                | 787.169                   |
| {w + [Pt(N <sub>3</sub> )(py) <sub>2</sub> ]} <sup>+</sup>                                                                     | C <sub>20</sub> H <sub>23</sub> N <sub>10</sub> O <sub>7</sub> PPt                             | 742.120                | 742.121                   |
| {d + [Pt(N <sub>3</sub> )(py) <sub>2</sub> ]} <sup>+</sup>                                                                     | C <sub>20</sub> H <sub>25</sub> N <sub>8</sub> O <sub>7</sub> PPt                              | 716.123                | 716.131                   |

|                                                                                                               |                                                                    |         |         |
|---------------------------------------------------------------------------------------------------------------|--------------------------------------------------------------------|---------|---------|
| $\{[{}^5\text{mCpG}] + [\text{Pt}(\text{N}_3)(\text{py})_2]_2\}^{2+}$ <b>18</b> <sup>2+</sup>                 | $\text{C}_{40}\text{H}_{45}\text{N}_{18}\text{O}_{10}\text{PPt}_2$ | 680.134 | 680.137 |
| $\{[{}^5\text{mCp}(\text{DIz})] + [\text{Pt}(\text{N}_3)(\text{py})_2]_2\}^{2+}$ <b>23</b>                    | $\text{C}_{38}\text{H}_{45}\text{N}_{18}\text{O}_9\text{PPt}_2$    | 660.130 | 660.139 |
| $\{[{}^5\text{mCpG}] + [\text{Pt}(\text{py})] + [\text{Pt}(\text{N}_3)(\text{py})_2] + \text{MeCN}\}^{2+}$    | $\text{C}_{37}\text{H}_{42}\text{N}_{15}\text{O}_{10}\text{PPt}_2$ | 639.622 | 639.621 |
| <b>19a + MeCN</b>                                                                                             |                                                                    |         |         |
| or $\{[{}^5\text{mCpG}] + [\text{Pt}(\text{N}_3)(\text{py})] + [\text{Pt}(\text{py})_2] + \text{MeCN}\}^{2+}$ |                                                                    |         |         |
| <b>19b + MeCN</b>                                                                                             |                                                                    |         |         |
| $\{\text{w} + [\text{Pt}(\text{N})(\text{py})]\}^+$                                                           | $\text{C}_{15}\text{H}_{18}\text{N}_7\text{O}_7\text{PPt}$         | 635.077 | 635.073 |
| $\{[{}^5\text{mCpG}] + \text{K}\}^+$                                                                          | $\text{C}_{20}\text{H}_{26}\text{N}_8\text{O}_{10}\text{PK}$       | 609.113 | 609.122 |
| $\{[{}^5\text{mCpG}] + \text{Na}\}^+$                                                                         | $\text{C}_{20}\text{H}_{26}\text{N}_8\text{O}_{10}\text{PNa}$      | 593.150 | 593.148 |
| $[{}^5\text{mCpG}]^+$                                                                                         | $\text{C}_{20}\text{H}_{27}\text{N}_8\text{O}_{10}\text{P}$        | 571.170 | 571.166 |
| $\{\text{G} + [\text{Pt}(\text{N}_3)(\text{py})_2]\}^+$                                                       | $\text{C}_{15}\text{H}_{14}\text{N}_{10}\text{OPt}$                | 546.111 | 546.107 |
| $\{\text{G} + [\text{Pt}(\text{py})_2] + \text{MeCN}\}^+$                                                     | $\text{C}_{17}\text{H}_{16}\text{N}_8\text{OPt}$                   | 544.117 | 544.117 |
| $\{{}^5\text{mC} + [\text{Pt}(\text{N}_3)(\text{py})_2]\}^+$                                                  | $\text{C}_{15}\text{H}_{16}\text{N}_8\text{OPt}$                   | 520.118 | 520.117 |
| $\{\text{G} + [\text{Pt}(\text{py})_2]\}^+$                                                                   | $\text{C}_{15}\text{H}_{13}\text{N}_7\text{OPt}$                   | 503.094 | 503.090 |
| $\{[{}^5\text{mCpG}] + [\text{Pt}(\text{N}_3)(\text{py})_2]\}^{2+}$                                           | $\text{C}_{30}\text{H}_{36}\text{N}_{13}\text{O}_{10}\text{PPt}$   | 483.115 | 483.112 |
| $\{\text{G} + \text{w} + [\text{Pt}(\text{N}_3)(\text{py})_2] + \text{MeCN} + \text{Na}\}^{2+}$               | $\text{C}_{27}\text{H}_{30}\text{N}_{16}\text{O}_8\text{PNaPt}$    | 478.593 | 478.593 |
| $[\text{Pt}(\text{N}_3)_2(\text{H}_2\text{O})_2(\text{py})_2]^+$                                              | $\text{C}_{10}\text{H}_{14}\text{N}_8\text{O}_2\text{Pt}$          | 474.100 | 474.096 |
| $\{\text{G} + [\text{Pt}(\text{py})] + \text{MeCN}\}^+$                                                       | $\text{C}_{12}\text{H}_{11}\text{N}_7\text{OPt}$                   | 465.078 | 465.075 |
| $\{[{}^5\text{mCpG}] + [\text{Pt}(\text{py})_2]\}^{2+}$ <b>40</b>                                             | $\text{C}_{30}\text{H}_{35}\text{N}_{10}\text{O}_{10}\text{PPt}$   | 461.608 | 461.604 |
| $[{}^5\text{mCpG} - {}^5\text{mC}]^+$                                                                         | $\text{C}_{15}\text{H}_{20}\text{N}_5\text{O}_9\text{P}$           | 446.110 | 446.107 |
| $[{}^5\text{mCpG} - \text{G}]^+$                                                                              | $\text{C}_{15}\text{H}_{22}\text{N}_3\text{O}_9\text{P}$           | 420.117 | 420.117 |
| $[\text{Pt}^{\text{III}}(\text{OH})_2(\text{py})_2]^+$                                                        | $\text{C}_{10}\text{H}_{11}\text{N}_2\text{O}_2\text{Pt}$          | 387.056 | 387.054 |
| $[\text{Pt}(\text{N})(\text{OH})(\text{py})_2]^+$                                                             | $\text{C}_{10}\text{H}_{10}\text{N}_3\text{OPt}$                   | 384.056 | 384.055 |
| $[\text{w}]^+$                                                                                                | $\text{C}_{10}\text{H}_{14}\text{N}_5\text{O}_7\text{P}$           | 348.074 | 348.070 |
| $\{{}^5\text{mC} + \text{G} + [\text{Pt}(\text{py})_2]\}^{2+}$                                                | $\text{C}_{20}\text{H}_{20}\text{N}_{10}\text{O}_2\text{Pt}$       | 314.581 | 314.578 |
| $\{\text{G} + [\text{Pt}(\text{py})_2] + \text{MeCN}\}^{2+}$                                                  | $\text{C}_{17}\text{H}_{16}\text{N}_8\text{OPt}$                   | 272.568 | 272.562 |
| $[\text{G}]^+$                                                                                                | $\text{C}_5\text{H}_5\text{N}_5\text{O}$                           | 152.060 | 152.057 |
| $[{}^5\text{mC}]^+$                                                                                           | $\text{C}_5\text{H}_7\text{N}_3\text{O}$                           | 126.071 | 126.066 |

**Table S4.** Fragment ions observed by MS/MS analysis under positive ion mode of the mono- and di-platinated dideoxynucleotides  $\{[{}^5\text{mCpG}] + [\text{Pt}(\text{N}_3)(\text{py})_2]_2\}^+$ ,  $\{[{}^5\text{mCpG}] + [\text{Pt}(\text{N}_3)(\text{py})_2]\}^+$ , and  $\{[{}^5\text{mCpG}] + [\text{Pt}(\text{N}_3)(\text{py})_2]_2\}^{2+}$  produced by the reaction of complex **1** with  ${}^5\text{mCpG}$  at 373 K after irradiation under blue light for 1 h. (Charges for Pt moiety in platinated nucleotide and the protons for balancing the charges of the ions are omitted for clarity). The scheme shows the fragmentation pathways of 5'- ${}^5\text{mCpG}$  as a representative during the CID fragmentation.

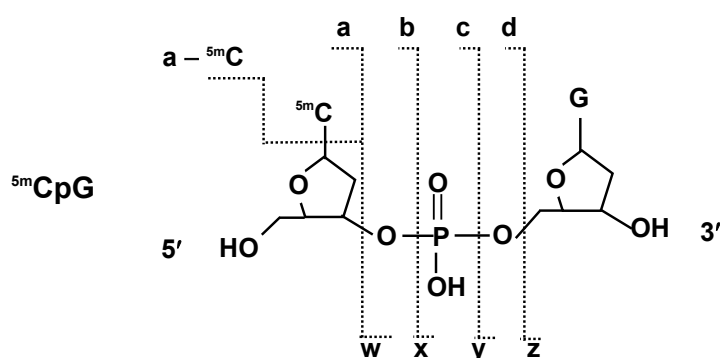

| Fragment ions                                                                                                                                                     | Molecular formula                                                  | Observed<br><i>m/z</i> | Theoretical<br><i>m/z</i> |
|-------------------------------------------------------------------------------------------------------------------------------------------------------------------|--------------------------------------------------------------------|------------------------|---------------------------|
| <b>Parent ion <math>\{[{}^5\text{mCpG}] + [\text{Pt}(\text{N}_3)(\text{py})_2]_2\}^+</math> (<b>18</b><sup>+</sup>)</b>                                           |                                                                    |                        |                           |
| $\{[{}^5\text{mCpG}] + [\text{Pt}(\text{N}_3)(\text{py})_2]_2\}^+$                                                                                                | $\text{C}_{40}\text{H}_{45}\text{N}_{18}\text{O}_{10}\text{PPt}_2$ | 1359.254               | 1359.267                  |
| $\{[{}^5\text{mCpG}] + [\text{Pt}(\text{N}_3)(\text{py})] + [\text{Pt}(\text{N}_3)(\text{py})_2]\}^+$                                                             | $\text{C}_{35}\text{H}_{40}\text{N}_{17}\text{O}_{10}\text{PPt}_2$ | 1280.208               | 1280.224                  |
| $\{[{}^5\text{mCpG} - {}^5\text{mC}] + [\text{Pt}(\text{N}_3)(\text{py})_2]_2\}^+$                                                                                | $\text{C}_{35}\text{H}_{38}\text{N}_{15}\text{O}_9\text{PPt}_2$    | 1234.198               | 1234.208                  |
| $\{[{}^5\text{mCpG}] + [\text{Pt}(\text{N}_3)(\text{py})_2]\}^+$                                                                                                  | $\text{C}_{30}\text{H}_{35}\text{N}_{16}\text{O}_{10}\text{PPt}_2$ | 1201.173               | 1201.182                  |
| unspecified                                                                                                                                                       |                                                                    | 1198.725               |                           |
| $\{[{}^5\text{mCpG}] + [\text{Pt}(\text{N})(\text{py})] + [\text{Pt}(\text{N}_3)(\text{py})]\}^+$                                                                 | $\text{C}_{30}\text{H}_{35}\text{N}_{14}\text{O}_{10}\text{PPt}_2$ | 1173.171               | 1173.176                  |
| $\{\text{w} + [\text{Pt}(\text{N}_3)(\text{py})_2]_2\}^+$                                                                                                         | $\text{C}_{30}\text{H}_{32}\text{N}_{15}\text{O}_7\text{PPt}_2$    | 1136.161               | 1136.171                  |
| $\{\text{w} + [\text{Pt}(\text{N}_3)(\text{py})] + [\text{Pt}(\text{N}_3)(\text{py})_2]\}^+$                                                                      | $\text{C}_{25}\text{H}_{27}\text{N}_{14}\text{O}_7\text{PPt}_2$    | 1057.124               | 1057.129                  |
| $\{[{}^5\text{mCpG}] + [\text{Pt}(\text{N})] + [\text{Pt}(\text{py})]\}^+$                                                                                        | $\text{C}_{25}\text{H}_{29}\text{N}_{10}\text{O}_{10}\text{PPt}_2$ | 1051.113               | 1051.117                  |
| $\{[{}^5\text{mCpG}] + [\text{Pt}(\text{N}_3)(\text{py})_2]\}^+$                                                                                                  | $\text{C}_{30}\text{H}_{36}\text{N}_{13}\text{O}_{10}\text{PPt}$   | 965.207                | 965.217                   |
| $\{\text{w} + [\text{Pt}(\text{N})] + [\text{Pt}(\text{N}_3)(\text{py})]\}^+$ or<br>$\{\text{w} + [\text{Pt}(\text{N}_3)] + [\text{Pt}(\text{N})(\text{py})]\}^+$ | $\text{C}_{15}\text{H}_{17}\text{N}_{10}\text{O}_7\text{PPt}_2$    | 871.038                | 871.038                   |
| $\{[{}^5\text{mCpG} - {}^5\text{mC}] + [\text{Pt}(\text{N}_3)(\text{py})_2]\}^+$                                                                                  | $\text{C}_{25}\text{H}_{29}\text{N}_{10}\text{O}_9\text{PPt}$      | 840.156                | 840.158                   |
| $\{\text{w} + [\text{Pt}(\text{N}_3)(\text{py})_2]\}^+$                                                                                                           | $\text{C}_{20}\text{H}_{23}\text{N}_{10}\text{O}_7\text{PPt}$      | 742.121                | 742.121                   |
| $[{}^5\text{mCpG}]^+$                                                                                                                                             | $\text{C}_{20}\text{H}_{27}\text{N}_8\text{O}_{10}\text{P}$        | 571.170                | 571.166                   |
| $\{\text{G} + [\text{Pt}(\text{N}_3)(\text{py})_2]\}^+$                                                                                                           | $\text{C}_{15}\text{H}_{14}\text{N}_{10}\text{OPt}$                | 546.111                | 546.107                   |
| $\{{}^5\text{mC} + [\text{Pt}(\text{N}_3)(\text{py})_2]\}^+$                                                                                                      | $\text{C}_{15}\text{H}_{16}\text{N}_8\text{OPt}$                   | 520.123                | 520.117                   |

|                                       |                                                          |         |         |
|---------------------------------------|----------------------------------------------------------|---------|---------|
| $[^{5m}\text{CpG} - ^{5m}\text{C}]^+$ | $\text{C}_{15}\text{H}_{20}\text{N}_5\text{O}_9\text{P}$ | 446.110 | 446.107 |
| $[\text{w}]^+$                        | $\text{C}_{10}\text{H}_{14}\text{N}_5\text{O}_7\text{P}$ | 348.075 | 348.070 |
| $[\text{G}]^+$                        | $\text{C}_5\text{H}_5\text{N}_5\text{O}$                 | 152.061 | 152.057 |
| $[^{5m}\text{C}]^+$                   | $\text{C}_5\text{H}_7\text{N}_3\text{O}$                 | 126.069 | 126.066 |

**Parent ion  $\{[^{5m}\text{CpG}] + [\text{Pt}(\text{N}_3)(\text{py})_2]\}^+$  (16)**

|                                                                                  |                                                                  |         |         |
|----------------------------------------------------------------------------------|------------------------------------------------------------------|---------|---------|
| $\{[^{5m}\text{CpG}] + [\text{Pt}(\text{N}_3)(\text{py})_2]\}^+$                 | $\text{C}_{30}\text{H}_{36}\text{N}_{13}\text{O}_{10}\text{PPt}$ | 965.213 | 965.217 |
| $\{[^{5m}\text{CpG}] + [\text{Pt}(\text{N})(\text{py})_2] + \text{O}\}^+$        | $\text{C}_{30}\text{H}_{36}\text{N}_{11}\text{O}_{11}\text{PPt}$ | 953.218 | 953.206 |
| unspecified                                                                      |                                                                  | 925.218 |         |
| $\{[^{5m}\text{CpG}] + [\text{Pt}(\text{N}_3)(\text{py})]\}^+$                   | $\text{C}_{25}\text{H}_{31}\text{N}_{12}\text{O}_{10}\text{PPt}$ | 886.172 | 886.175 |
| $\{[^{5m}\text{CpG} - ^{5m}\text{C}] + [\text{Pt}(\text{N}_3)(\text{py})_2]\}^+$ | $\text{C}_{25}\text{H}_{29}\text{N}_{10}\text{O}_9\text{PPt}$    | 840.156 | 840.158 |
| $\{[^{5m}\text{CpG} - \text{G}] + [\text{Pt}(\text{N}_3)(\text{py})_2]\}^+$      | $\text{C}_{25}\text{H}_{31}\text{N}_8\text{O}_9\text{PPt}$       | 814.162 | 814.167 |
| $\{[^{5m}\text{CpG}] + [\text{Pt}(\text{NH}_3)] + \text{H}_2\text{O}\}^+$        | $\text{C}_{20}\text{H}_{30}\text{N}_9\text{O}_{11}\text{PPt}$    | 799.160 | 799.152 |
| unspecified                                                                      |                                                                  | 788.134 |         |
| $\{[^{5m}\text{CpG}] + [\text{Pt}(\text{N})]\}^+$                                | $\text{C}_{20}\text{H}_{26}\text{N}_9\text{O}_{10}\text{PPt}$    | 779.127 | 779.126 |
| $\{\text{w} + [\text{Pt}(\text{N}_3)(\text{py})_2]\}^+$                          | $\text{C}_{20}\text{H}_{23}\text{N}_{10}\text{O}_7\text{PPt}$    | 742.120 | 742.121 |
| $\{\text{y} + [\text{Pt}(\text{N}_3)(\text{py})_2]\}^+$                          | $\text{C}_{20}\text{H}_{22}\text{N}_{10}\text{O}_4\text{Pt}$     | 662.158 | 662.155 |
| $\{\text{w} + [\text{Pt}(\text{N})(\text{py})]\}^+$                              | $\text{C}_{15}\text{H}_{18}\text{N}_7\text{O}_7\text{PPt}$       | 635.077 | 635.073 |
| $\{\text{w} + [\text{Pt}(\text{N})(\text{py})] - \text{H}_2\text{O}\}^+$         | $\text{C}_{15}\text{H}_{16}\text{N}_7\text{O}_6\text{PPt}$       | 617.064 | 617.062 |
| $\{\text{G} + [\text{Pt}(\text{N}_3)(\text{py})_2]\}^+$                          | $\text{C}_{15}\text{H}_{14}\text{N}_{10}\text{OPt}$              | 546.111 | 546.107 |
| $\{^{5m}\text{C} + [\text{Pt}(\text{N}_3)(\text{py})_2]\}^+$                     | $\text{C}_{15}\text{H}_{16}\text{N}_8\text{OPt}$                 | 520.118 | 520.117 |
| $\{\text{G} + [\text{Pt}(\text{N}_3)(\text{py})] + \text{H}_2\text{O}\}^+$       | $\text{C}_{10}\text{H}_{11}\text{N}_9\text{O}_2\text{Pt}$        | 485.080 | 485.076 |
| $\{\text{G} + [\text{Pt}(\text{N})(\text{py})] + \text{H}_2\text{O}\}^+$         | $\text{C}_{10}\text{H}_{11}\text{N}_7\text{O}_2\text{Pt}$        | 457.069 | 457.069 |
| $\{\text{G} + [\text{Pt}(\text{N})(\text{py})]\}^+$                              | $\text{C}_{10}\text{H}_9\text{N}_7\text{OPt}$                    | 439.061 | 439.059 |

**Parent ion  $\{[^{5m}\text{CpG}] + [\text{Pt}(\text{N}_3)(\text{py})_2]_2\}^{2+}$  (18<sup>2+</sup>)**

|                                                                                                  |                                                                    |         |         |
|--------------------------------------------------------------------------------------------------|--------------------------------------------------------------------|---------|---------|
| $\{[^{5m}\text{CpG}] + [\text{Pt}(\text{N}_3)(\text{py})_2]\}^+$                                 | $\text{C}_{30}\text{H}_{36}\text{N}_{13}\text{O}_{10}\text{PPt}$   | 965.211 | 965.217 |
| $\{[^{5m}\text{CpG}] + [\text{Pt}(\text{N}_3)(\text{py})]\}^+$                                   | $\text{C}_{25}\text{H}_{31}\text{N}_{12}\text{O}_{10}\text{PPt}$   | 886.171 | 886.175 |
| $\{[^{5m}\text{CpG} - \text{G}] + [\text{Pt}(\text{N}_3)(\text{py})_2]\}^+$                      | $\text{C}_{25}\text{H}_{31}\text{N}_8\text{O}_9\text{PPt}$         | 814.161 | 814.167 |
| $\{[^{5m}\text{CpG} - \text{G}] + [\text{Pt}(\text{N}_3)(\text{py})_2] - \text{H}_2\text{O}\}^+$ | $\text{C}_{25}\text{H}_{29}\text{N}_8\text{O}_8\text{PPt}$         | 796.151 | 796.157 |
| $\{\text{w} + [\text{Pt}(\text{N}_3)(\text{py})_2]\}^+$                                          | $\text{C}_{20}\text{H}_{23}\text{N}_{10}\text{O}_7\text{PPt}$      | 742.119 | 742.121 |
| $\{[^{5m}\text{CpG}] + [\text{Pt}(\text{N}_3)(\text{py})_2]_2\}^{2+}$                            | $\text{C}_{40}\text{H}_{45}\text{N}_{18}\text{O}_{10}\text{PPt}_2$ | 680.132 | 680.137 |
| $\{\text{w} + [\text{Pt}(\text{N})(\text{py})]\}^+$                                              | $\text{C}_{15}\text{H}_{18}\text{N}_7\text{O}_7\text{PPt}$         | 635.076 | 635.073 |
| $\{\text{w} + [\text{Pt}(\text{N}_3)] + \text{H}_2\text{O}\}^+$                                  | $\text{C}_{10}\text{H}_{15}\text{N}_8\text{O}_8\text{PPt}$         | 602.050 | 602.047 |
| $\{\text{w} + [\text{Pt}(\text{N})]\}^+$                                                         | $\text{C}_{10}\text{H}_{13}\text{N}_6\text{O}_7\text{PPt}$         | 556.028 | 556.030 |
| $\{\text{G} + [\text{Pt}(\text{N}_3)(\text{py})_2]\}^+$                                          | $\text{C}_{15}\text{H}_{14}\text{N}_{10}\text{OPt}$                | 546.109 | 546.107 |
| $\{^{5m}\text{C} + [\text{Pt}(\text{N}_3)(\text{py})_2]\}^+$                                     | $\text{C}_{15}\text{H}_{16}\text{N}_8\text{OPt}$                   | 520.117 | 520.117 |
| $\{\text{G} + [\text{Pt}(\text{N}_3)(\text{py})]\}^+$                                            | $\text{C}_{10}\text{H}_9\text{N}_9\text{OPt}$                      | 467.062 | 467.065 |
| $\{^{5m}\text{C} + [\text{Pt}(\text{N})(\text{py})]\}^+$                                         | $\text{C}_{10}\text{H}_{11}\text{N}_5\text{OPt}$                   | 413.068 | 413.068 |
| $[\text{Pt}(\text{N}_3)(\text{py})_2]^+$                                                         | $\text{C}_{10}\text{H}_9\text{N}_5\text{Pt}$                       | 395.058 | 395.058 |
| $[\text{Pt}(\text{N})(\text{py})_2]^+$                                                           | $\text{C}_{10}\text{H}_9\text{N}_3\text{Pt}$                       | 367.053 | 367.052 |
| $[\text{Pt}(\text{N})(\text{py})]^+$                                                             | $\text{C}_5\text{H}_4\text{N}_2\text{Pt}$                          | 288.013 | 288.010 |
| $[\text{G}]^+$                                                                                   | $\text{C}_5\text{H}_5\text{N}_5\text{O}$                           | 152.060 | 152.057 |
| $[^{5m}\text{C}]^+$                                                                              | $\text{C}_5\text{H}_7\text{N}_3\text{O}$                           | 126.069 | 126.066 |
